# Supplementary material for: The plastid-nucleus localized DNA-binding protein WHIRLY1 is required for acclimation of barley leaves to high light
Source: Springer Nature journal article supplement (doi:10.1007/s00425-022-03854-x), 2022-03-13
Supplement: MOESM1 [file 425_2022_3854_MOESM1_ESM.pdf]

# The plastid-nucleus localized DNA-binding protein WHIRLY1 is required for acclimation of barley leaves to high light

Monireh Saeid-Nia<sup>1</sup>, Urska Repnik<sup>2</sup>, Karin Krupinska<sup>1</sup>, Wolfgang Bilger<sup>1</sup>

<sup>1</sup> Institute of Botany, Christian-Albrechts-University, Kiel, Germany

<sup>2</sup> Central Microscopy, Department of Biology, Christian-Albrechts-University, Kiel, Germany

## Supplementary Data

**Tab. S1** Two-way ANOVA analysis of variance for CO<sub>2</sub> assimilation rate at 1500  $\mu\text{mol m}^{-2} \text{s}^{-1}$  and in presence of 380 ppm CO<sub>2</sub> in WT and W1 plants grown under either low light or high light and at 10 days after sowing

| Source of Variation | DF | SS       | MS       | F       | P      |
|---------------------|----|----------|----------|---------|--------|
| Factor 1: genotype  | 1  | 2358.512 | 2358.512 | 152.285 | <0.001 |
| Factor 2: light     | 1  | 16.242   | 16.242   | 1.049   | 0.313  |
| Factor 1 x Factor 2 | 1  | 419.602  | 419.602  | 27.093  | <0.001 |
| Residual            | 33 | 511.086  | 15.487   |         |        |
| Total               | 36 | 3409.465 | 94.707   |         |        |

**Tab. S2** Three-way ANOVA analysis of variance for chlorophyll content for WT and W1 plants grown under low and high light at different ages (10, 15, and 19 days after sowing)

| Source of Variation            | DF  | SS        | MS        | F       | P      |
|--------------------------------|-----|-----------|-----------|---------|--------|
| Factor 1: genotype             | 1   | 11556.472 | 11556.472 | 332.963 | <0.001 |
| Factor 2: light                | 1   | 3417.565  | 3417.565  | 98.466  | <0.001 |
| Factor 3: age                  | 2   | 2404.694  | 1202.347  | 34.642  | <0.001 |
| Factor 1 x Factor 2            | 1   | 511.749   | 511.749   | 14.744  | <0.001 |
| Factor 1 x Factor 3            | 2   | 3864.964  | 1932.482  | 55.678  | <0.001 |
| Factor 2 x Factor 3            | 2   | 648.224   | 324.112   | 9.338   | <0.001 |
| Factor 1 x Factor 2 x Factor 3 | 2   | 1362.243  | 681.122   | 19.624  | <0.001 |
| Residual                       | 344 | 11939.528 | 34.708    |         |        |
| Total                          | 355 | 35978.175 | 101.347   |         |        |

**Tab. S3** Three-way ANOVA analysis of variance for CO<sub>2</sub> assimilation rate at saturating light and in presence of 2000 ppm CO<sub>2</sub> (P<sub>max</sub>) in WT and W1 plants grown under either low light or high light and at different ages (10, 15, and 19 days after sowing)

| Source of Variation            | DF | SS        | MS       | F      | P      |
|--------------------------------|----|-----------|----------|--------|--------|
| Factor 1: genotype             | 1  | 1937.423  | 1937.423 | 35.580 | <0.001 |
| Factor 2: growth light         | 1  | 805.912   | 805.912  | 16.048 | <0.001 |
| Factor 3: age                  | 2  | 283.213   | 141.608  | 2.820  | 0.065  |
| Factor 1 x Factor 2            | 1  | 1991.606  | 1991.606 | 39.659 | <0.001 |
| Factor 1 x Factor 3            | 2  | 2237.461  | 1118.730 | 22.277 | <0.001 |
| Factor 2 x Factor 3            | 2  | 224.221   | 112.111  | 2.232  | 0.114  |
| Factor 1 x Factor 2 x Factor 3 | 2  | 740.616   | 370.308  | 7.374  | 0.001  |
| Residual                       | 84 | 4218.352  | 50.218   |        |        |
| Total                          | 95 | 13688.675 | 144.091  |        |        |

**Tab. S4** Three-way ANOVA analysis of variance for carboxylation efficiencies in WT and W1 plants grown under low light or high light and at different ages (10, 15, and 19 days after sowing)

| Source of Variation            | DF  | SS        | MS        | F       | P      |
|--------------------------------|-----|-----------|-----------|---------|--------|
| Factor 1: genotype             | 1   | 0.0510    | 0.0510    | 118.196 | <0.001 |
| Factor 2: growth light         | 1   | 0.0000152 | 0.0000152 | 0.0353  | 0.851  |
| Factor 3: age                  | 2   | 0.0102    | 0.00508   | 11.782  | <0.001 |
| Factor 1 x Factor 2            | 1   | 0.00277   | 0.00277   | 6.415   | 0.013  |
| Factor 1 x Factor 3            | 2   | 0.0553    | 0.0276    | 64.095  | <0.001 |
| Factor 2 x Factor 3            | 2   | 0.00465   | 0.00233   | 5.392   | 0.006  |
| Factor 1 x Factor 2 x Factor 3 | 2   | 0.0287    | 0.0144    | 33.309  | <0.001 |
| Residual                       | 116 | 0.0500    | 0.000431  |         |        |
| Total                          | 127 | 0.215     | 0.00196   |         |        |

**Tab. S5** Three-way ANOVA analysis of variance for leaf thickness per area for WT and W1 plants grown under low and high light at different ages (10, 15, and 19 days after sowing)

| Source of Variation            | DF  | SS       | MS       | F      | P      |
|--------------------------------|-----|----------|----------|--------|--------|
| Factor 1: genotype             | 1   | 0.0272   | 0.0272   | 33.985 | <0.001 |
| Factor 2: light                | 1   | 0.0344   | 0.0344   | 42.888 | <0.001 |
| Factor 3: age                  | 2   | 0.00274  | 0.00137  | 1.708  | 0.184  |
| Factor 1 x Factor 2            | 1   | 0.0250   | 0.0250   | 31.214 | <0.001 |
| Factor 1 x Factor 3            | 2   | 0.00164  | 0.000820 | 1.024  | 0.361  |
| Factor 2 x Factor 3            | 2   | 0.00288  | 0.00144  | 1.795  | 0.169  |
| Factor 1 x Factor 2 x Factor 3 | 2   | 0.000255 | 0.000127 | 0.159  | 0.853  |
| Residual                       | 161 | 0.129    | 0.000801 |        |        |
| Total                          | 172 | 0.226    | 0.00131  |        |        |

**Tab. S6** Three-way ANOVA analysis of variance for leaf mass per area for WT and W1 plants grown under low and high light at different ages (10, 15, and 19 days after sowing)

| Source of Variation            | DF  | SS        | MS       | F       | P      |
|--------------------------------|-----|-----------|----------|---------|--------|
| Factor 1: genotype             | 1   | 2368.336  | 2368.336 | 53.162  | <0.001 |
| Factor 2: light                | 1   | 8540.683  | 8540.683 | 191.712 | <0.001 |
| Factor 3: age                  | 2   | 1107.254  | 553.627  | 12.427  | <0.001 |
| Factor 1 x Factor 2            | 1   | 2364.286  | 2364.286 | 53.071  | <0.001 |
| Factor 1 x Factor 3            | 2   | 852.983   | 426.492  | 9.573   | <0.001 |
| Factor 2 x Factor 3            | 2   | 166.205   | 83.102   | 1.865   | 0.159  |
| Factor 1 x Factor 2 x Factor 3 | 2   | 475.722   | 237.861  | 5.339   | 0.006  |
| Residual                       | 143 | 6370.582  | 44.550   |         |        |
| Total                          | 154 | 24487.535 | 159.010  |         |        |

**Tab. S7** Two-way analysis of variance for cytoplasm/cell volume of WT and W1 plants grown under low and high light at 10 days after sowing

| Source of Variation | DF | SS       | MS      | F      | P      |
|---------------------|----|----------|---------|--------|--------|
| Factor 1: genotype  | 1  | 505.772  | 505.772 | 27.913 | <0.001 |
| Factor 2: light     | 1  | 580.762  | 580.762 | 32.051 | <0.001 |
| Factor 1 x Factor 2 | 1  | 460.563  | 460.563 | 25.418 | <0.001 |
| Residual            | 8  | 144.957  | 18.120  |        |        |
| Total               | 11 | 1692.054 | 153.823 |        |        |

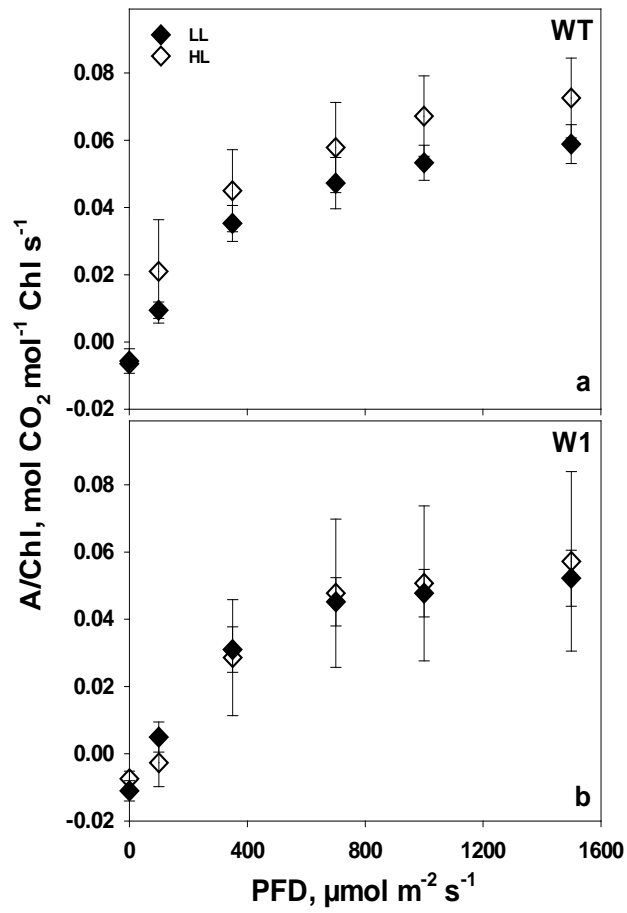

**Fig. S1** Light dependency of the CO<sub>2</sub> assimilation rate per chlorophyll content (A/Chl) as a function of incident irradiance (PFD) measured in the presence of 380 ppm CO<sub>2</sub> in LL (filled symbols) and HL (open symbols) grown plants for both WT (a) and W1 (b) at day 10. Depicted are means  $\pm$  standard deviation of n=9-15 leaves in total from three independent experiments each comprising 3-5 leaves

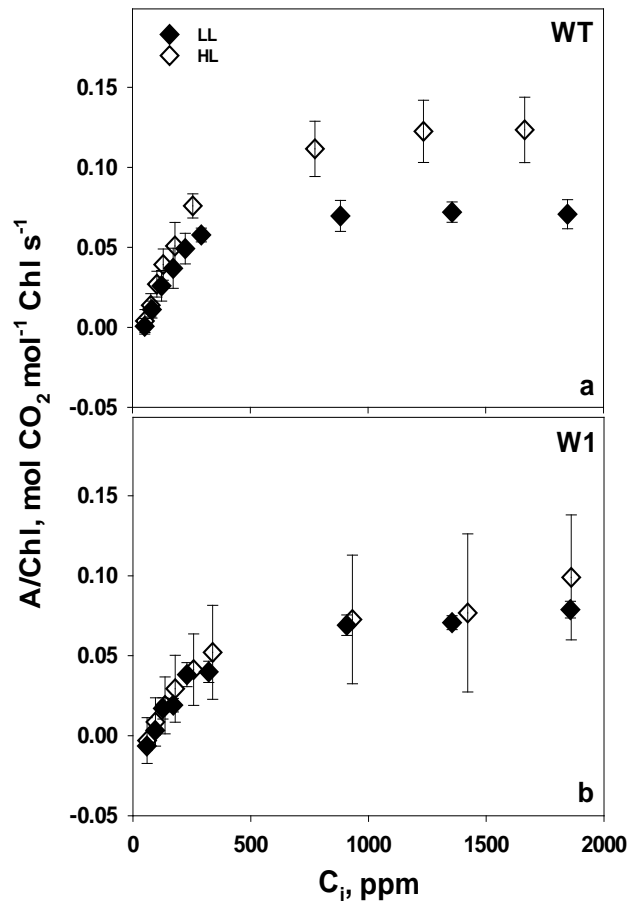

**Fig. S2** A per chl content ( $A/Chl$ ) as a function of internal  $CO_2$  concentration ( $C_i$ ) measured in LL (filled symbols) and HL (open symbols) grown plants for both WT (a) and W1 (b) at day 10 with 1000-1500  $\mu\text{mol m}^{-2} \text{s}^{-1}$  light as the saturating light. Depicted are means  $\pm$  standard deviation of  $n=9-15$  leaves in total from three independent experiments each comprising 3-5 leaves

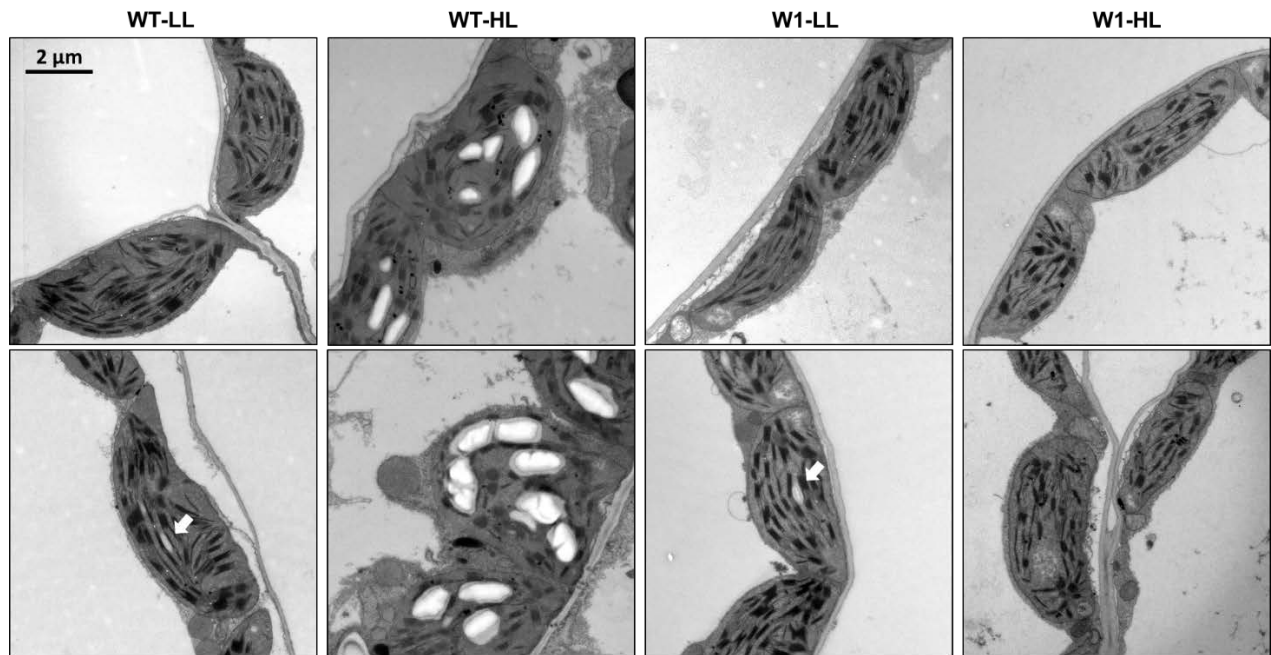

**Fig. S3** Ultrastructural analysis of mesophyll in WT and W1 primary leaves grown under high or low light for 10 days, showing differences in the abundance of starch granules in chloroplasts. Two representative electron micrographs are shown for each sample group. Chloroplasts of WT plants grown under high light contain large starch granules, which appear as electron lucent inclusions. In WT and W1 plants grown under low light, occasionally small starch granules are present (white block arrows)
